# Supplementary material for: The i-AAA protease YME1L and OMA1 cleave OPA1 to balance mitochondrial fusion and fission
Source: PubMed Central journal article supplement — J Cell Biol. 2014 Mar 17;204(6):919–29. doi: 10.1083/jcb.201308006 (PMC3998800; doi:10.1083/jcb.201308006), 2014-03-17
Supplement: supp_jcb.201308006_JCB_201308006_sm.pdf [file supp_jcb.201308006_JCB_201308006_sm.pdf]

Anand et al., <http://www.jcb.org/cgi/content/full/jcb.201308006/DC1>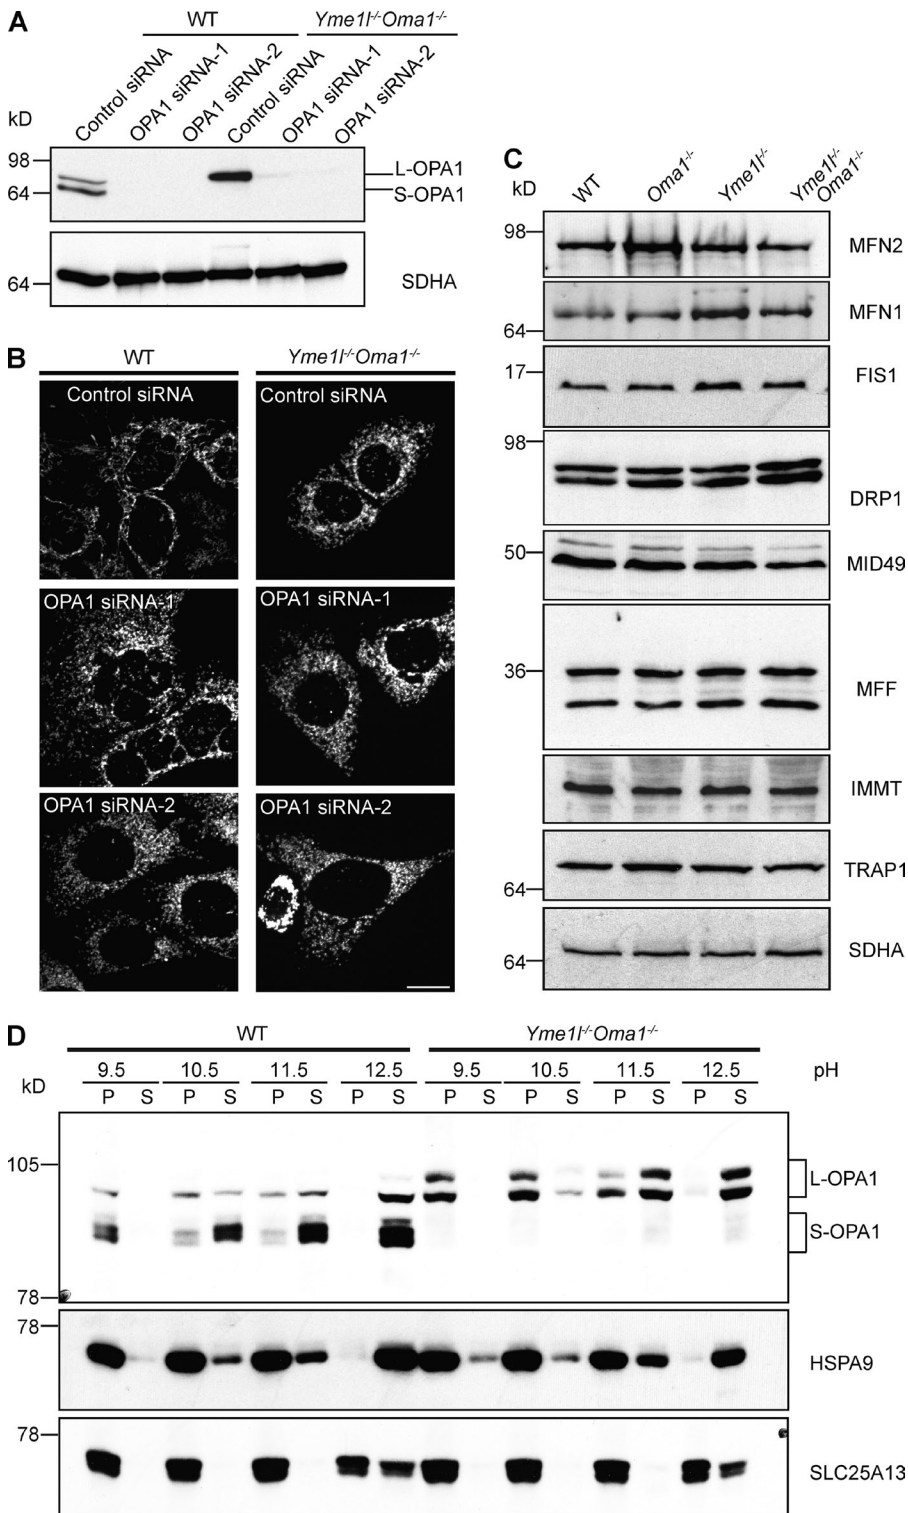

Figure S1. **The formation of tubular mitochondria in *Yme1<sup>-/-</sup>Oma1<sup>-/-</sup>* cells depends on OPA1.** (A) Immunoblot analysis of lysates of WT and *Yme1<sup>-/-</sup>Oma1<sup>-/-</sup>* MEFs after siRNA-mediated down-regulation of OPA1. Two independent siRNA oligos targeting *Opa1* were used (siRNA-1 and siRNA-2). (B) Depletion of OPA1 causes mitochondrial fragmentation in WT and *Yme1<sup>-/-</sup>Oma1<sup>-/-</sup>* MEFs. Bar, 15  $\mu$ m. (C) Immunoblot analysis of cell lysates of WT, *Oma1<sup>-/-</sup>*, *Yme1<sup>-/-</sup>*, and *Yme1<sup>-/-</sup>Oma1<sup>-/-</sup>* MEFs using antibodies against MFN2 (anti-rabbit; Sigma-Aldrich), MFN1 (anti-rabbit; Abcam), FIS1 (anti-rabbit; Proteintech), DRP1 (anti-mouse; BD), MID49 (anti-rabbit; Proteintech), IMMT (anti-rabbit; Proteintech), TRAP1 (anti-mouse; BD), and SDHA (anti-mouse; Invitrogen). (D) Alkaline extraction of mitochondria from WT and *Yme1<sup>-/-</sup>Oma1<sup>-/-</sup>* MEFs at the indicated pHs demonstrating differential solubility of L- and S-OPA1. The mitochondrial Hsp70 protein HSPA9 is soluble in the matrix, whereas the mitochondrial carrier protein SLC25A13 (CITRIN) is an integral IM protein.

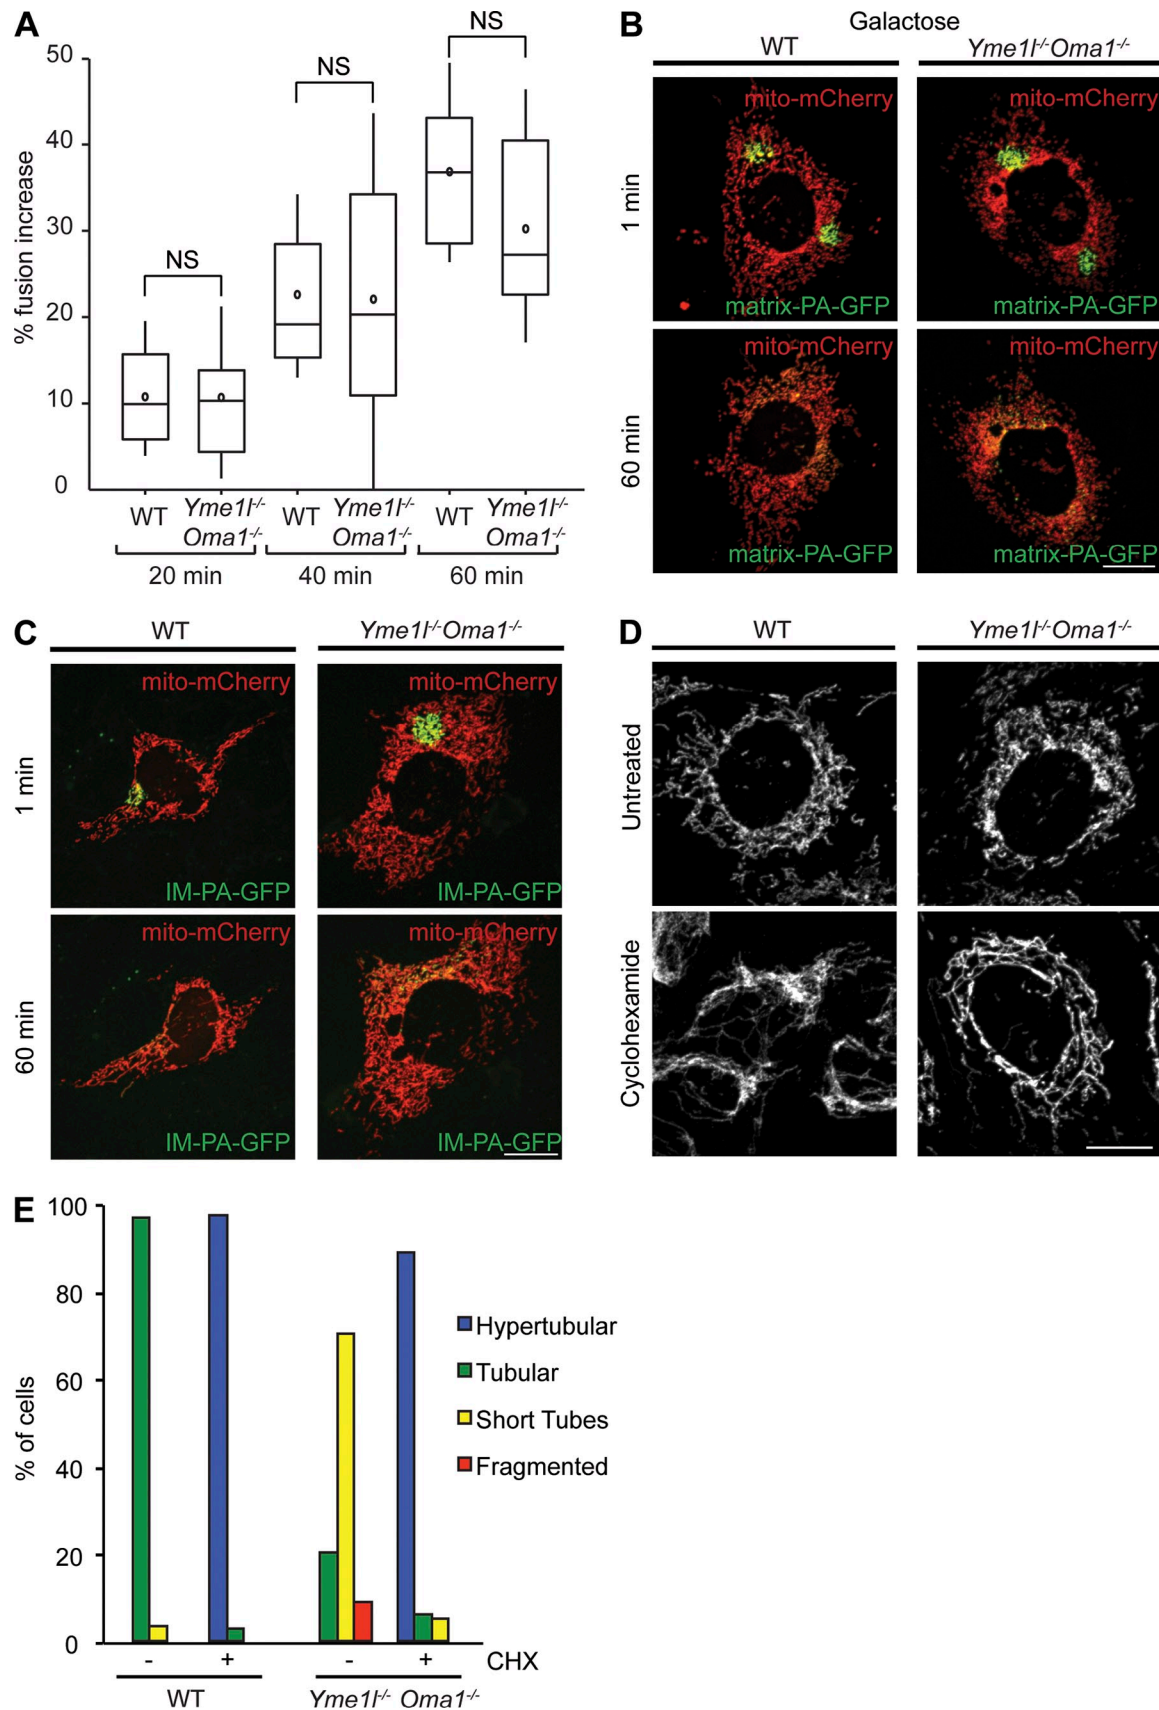

Figure S2. **Mitochondrial fusion in *Yme1<sup>-/-</sup> Oma1<sup>-/-</sup>* cells.** (A) PA-GFP targeted to the matrix was used to monitor fusion by the time-dependent dilution and redistribution of GFP fluorescence in WT and *Yme1<sup>-/-</sup> Oma1<sup>-/-</sup>* MEFs grown in glucose-containing media. Results are shown as a box plot representation of mitochondrial fusion quantified at 20, 40, or 60 min after photoactivation (WT vs. *Yme1<sup>-/-</sup> Oma1<sup>-/-</sup>* cells;  $P = 0.91$  at 20 min,  $P = 0.91$  at 40 min, and  $P = 0.14$  at 60 min). (B) Mitochondrial fusion occurs in WT and *Yme1<sup>-/-</sup> Oma1<sup>-/-</sup>* MEFs grown in galactose-containing media for 24 h. (C) PA-GFP targeted to the IM (IM-PA-GFP; amino-terminal region of ABCB10 fused to mito-mCherry) was expressed in WT and *Yme1<sup>-/-</sup> Oma1<sup>-/-</sup>* MEFs, and fusion was monitored. (D) Mitochondria hyperfuse in *Yme1<sup>-/-</sup> Oma1<sup>-/-</sup>* cells under stress. *Yme1<sup>-/-</sup> Oma1<sup>-/-</sup>* cells were incubated for 8 h in the presence of 10  $\mu\text{M}$  cycloheximide. Bars, 15  $\mu\text{m}$ . (E) Quantification of mitochondrial morphology ( $n \geq 100$ ).

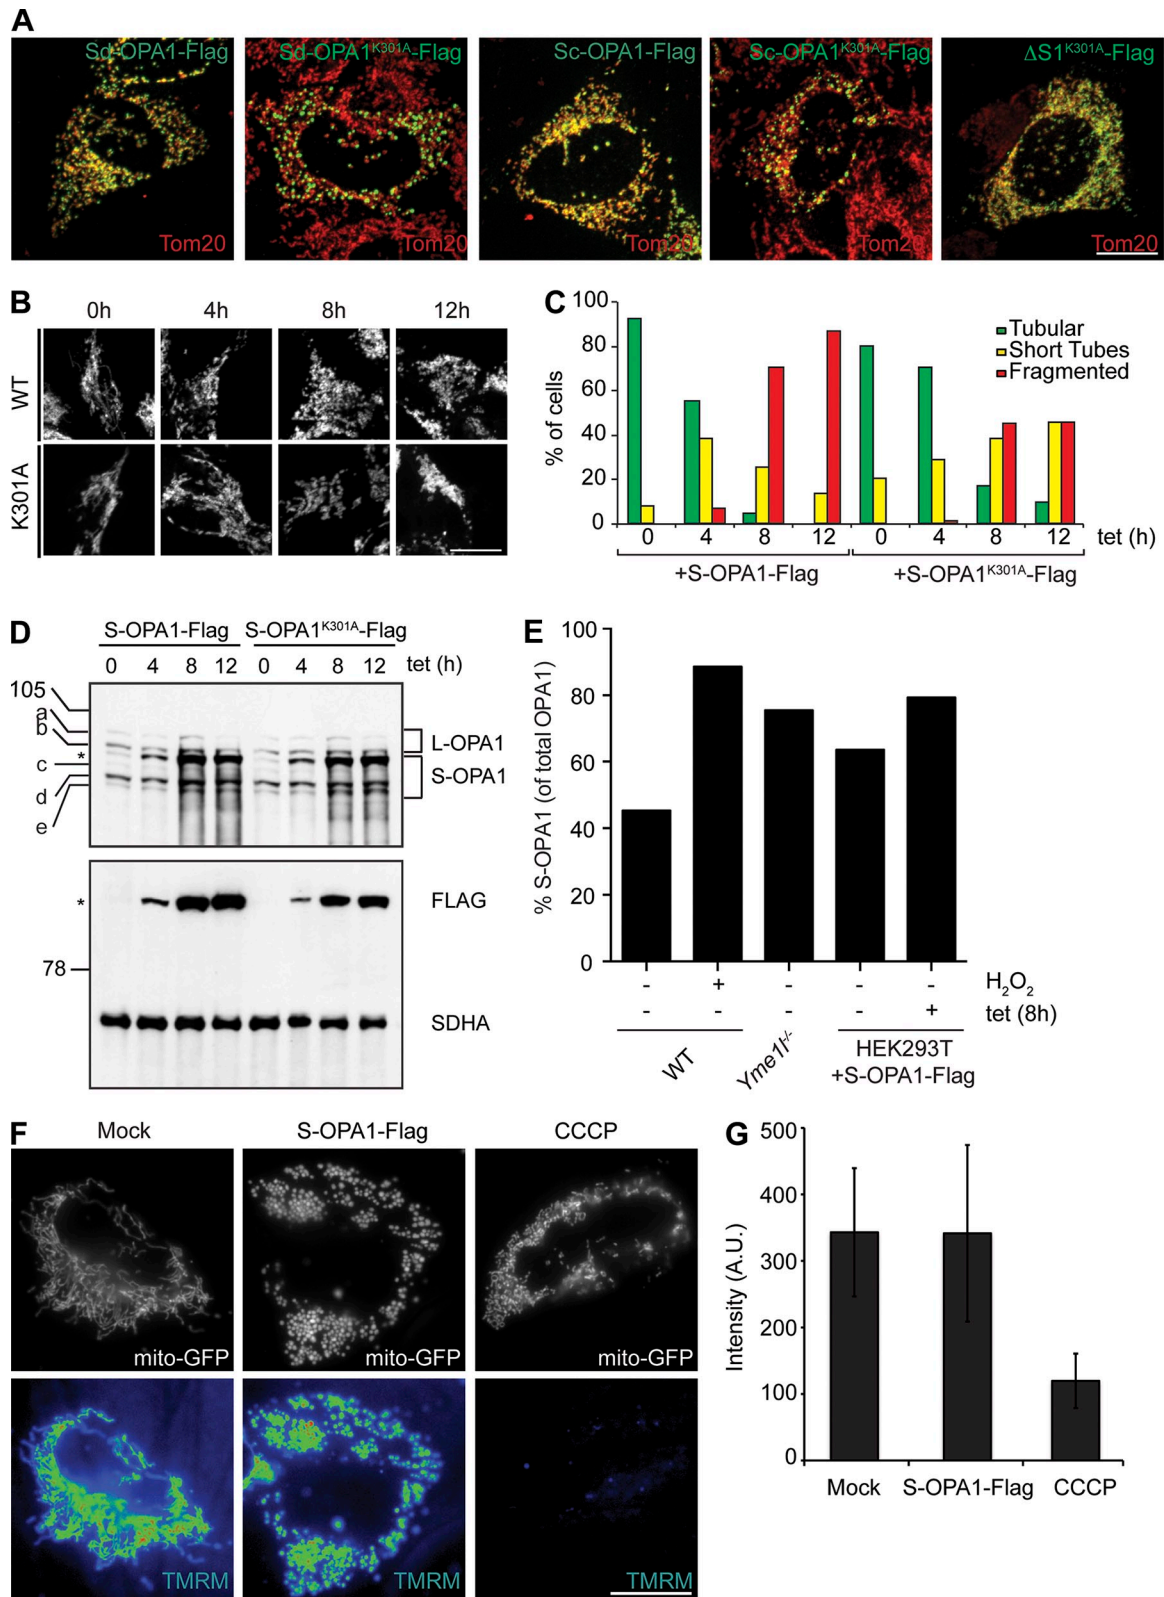

**Figure S3. Ectopic S-OPA1 expression induces mitochondrial fragmentation but does not cause general mitochondrial dysfunction.** (A) WT MEFs overexpressing human S-OPA1 form d (Sd-OPA1-Flag; amino acids 1–97 of rat AIF fused to amino acids 210–997 of human OPA1 sp7) and human S-OPA1 form c (Sc-OPA1; amino acids 1–97 of rat AIF fused to amino acids 194–997 of human OPA1 sp7) fragment mitochondria, whereas Sd-OPA1<sup>K301A</sup> and Sc-OPA1<sup>K301A</sup> variants form punctae. Noncleavable L-OPA1<sup>K301A</sup> ( $\Delta S1^{K301A}$ -Flag) expression neither fragments the mitochondrial network nor accumulates in punctae structures. Bar, 15  $\mu$ m. (B) Tetracycline-induced, stable expression of rat S-OPA1-Flag (amino acids 1–97 of rat AIF fused to amino acids 230–997 of rat OPA1) and rat S-OPA1<sup>K301A</sup>-Flag in HEK293T cells. Mitochondrial morphology was assessed at the indicated time points after the addition of tetracycline. (C) Quantification of mitochondrial morphology in cells shown in B ( $n > 100$ ). (D) Immunoblot analysis of cell lysates using anti-OPA1, anti-FLAG, and anti-SDHA antibodies. The asterisks denote tetracycline-induced rat S-OPA1-Flag. (E) The induced increase in S-OPA1 levels is associated with mitochondrial fragmentation in different cells. After SDS-PAGE and immunoblotting, S-OPA1 forms were quantified by laser densitometry (from Figs. 3 B and S3 D) and are shown as the percentage of total OPA1. (F) Transient overexpression of rat S-OPA1-Flag does not impair the mitochondrial membrane potential monitored by TMRM fluorescence. For control, mitochondria were depolarized by the addition of 20  $\mu$ M CCCP for 30 min. (G) Quantification of TMRM intensity in mock-treated, S-OPA1–expressing, and CCCP-treated cells.
